# Supplementary material
Source: publisher site journal article supplement (https://www.spandidos-publications.com/4067/downloadSupplementary)

Figure S1. Approximately 20% of the tumor cells were positive for c-kit in this case.

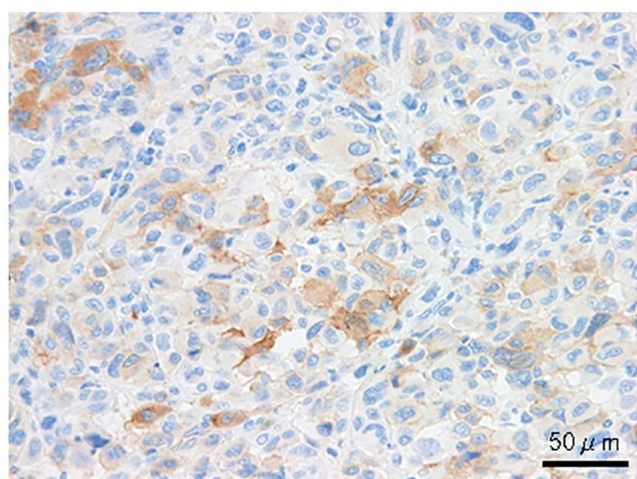

Supplement: Supplementary file 1 [file downloadSupplementary]
